# Supplementary material for: Landscape of genomic alterations in high-grade serous ovarian cancer from exceptional long- and short-term survivors
Source: PubMed Central journal article supplement (PMC6208125; doi:10.1186/s13073-018-0590-x), 2018-10-31

**LTS-001**

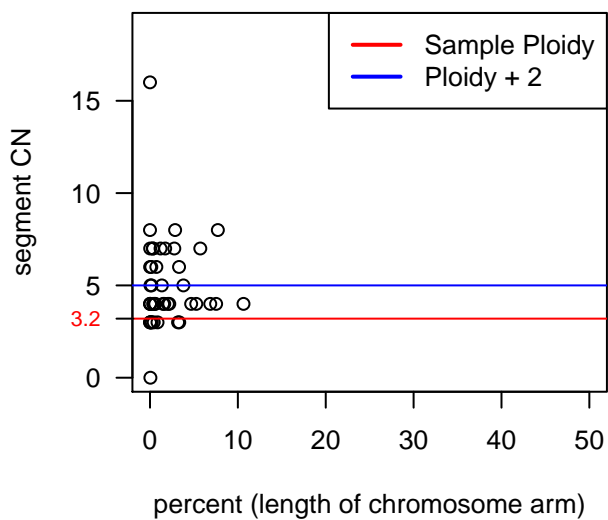

**LTS-002**

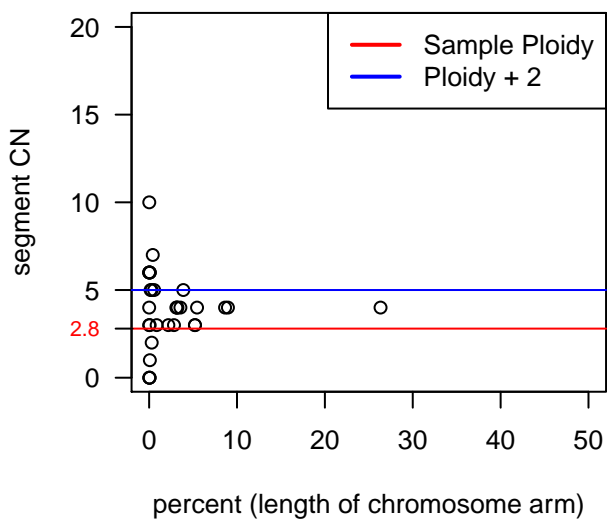

**LTS-003**

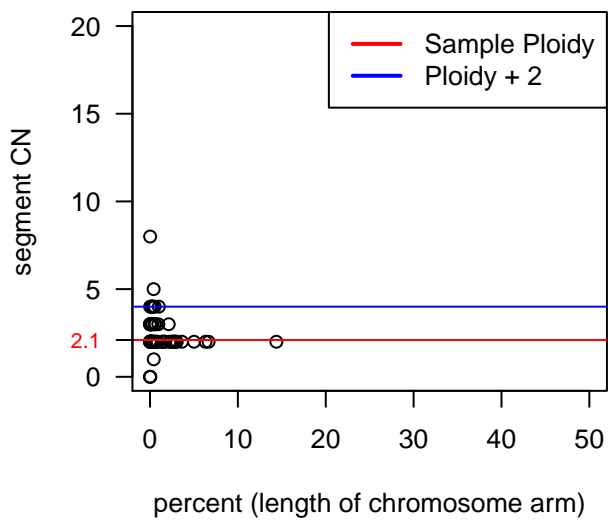

**LTS-004**

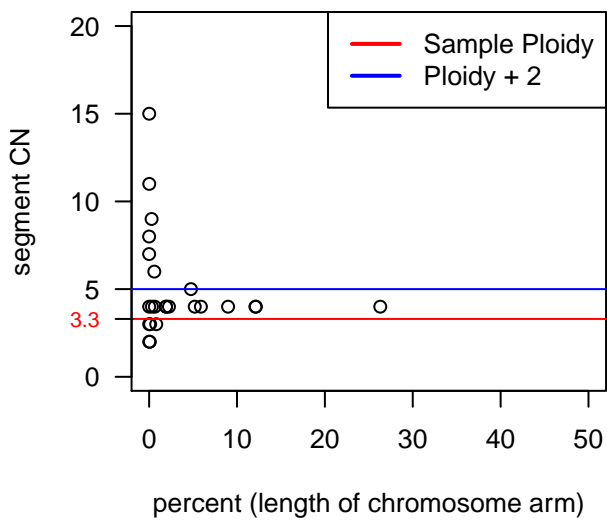

**LTS-005**

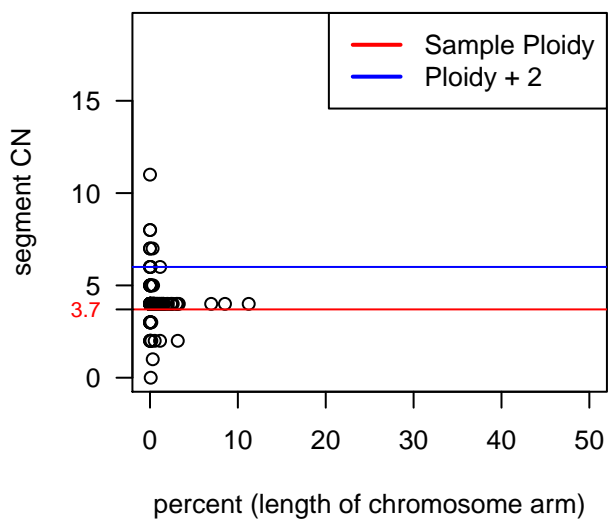

**LTS-006**

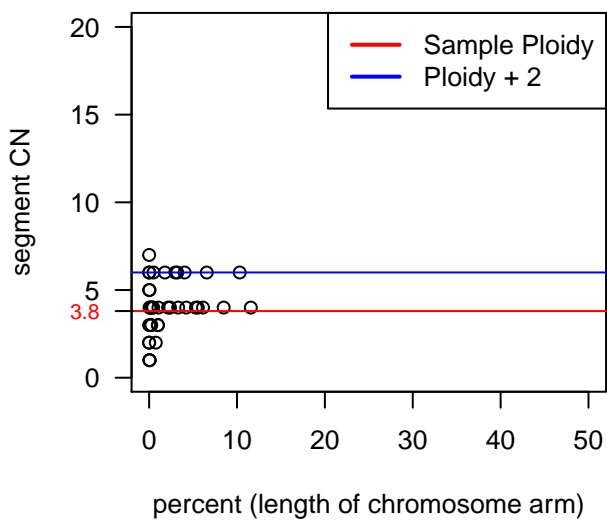

**LTS-007**

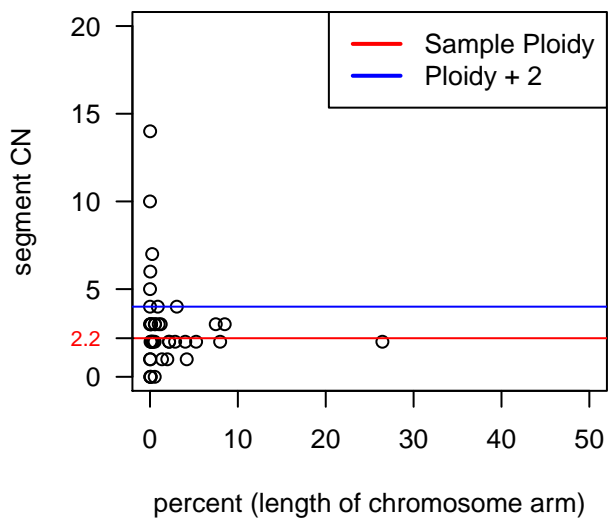

**LTS-008**

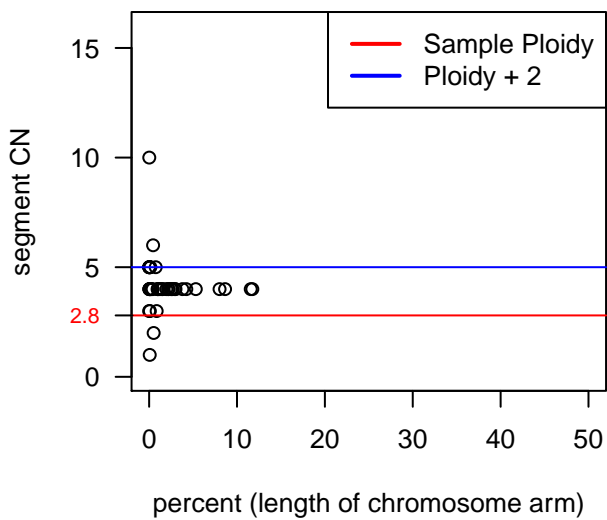

**LTS-009**

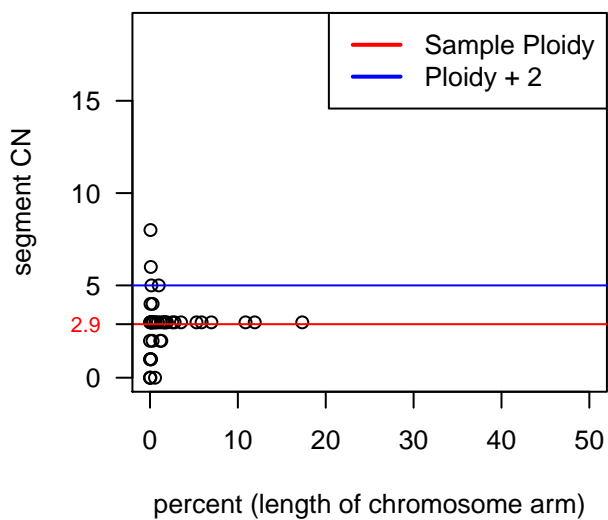

**LTS-010**

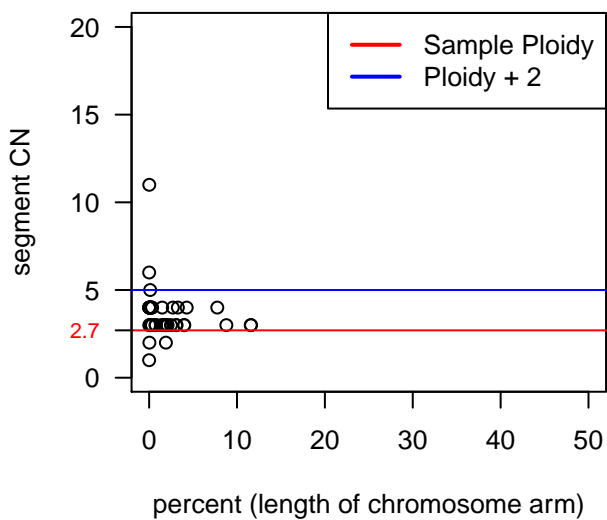

**LTS-011**

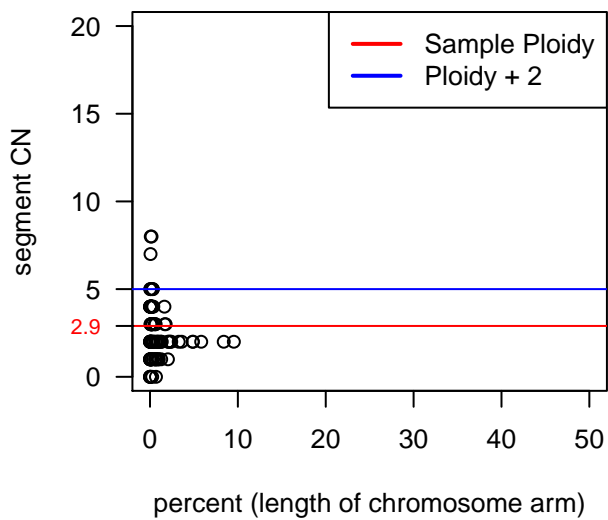

**LTS-012**

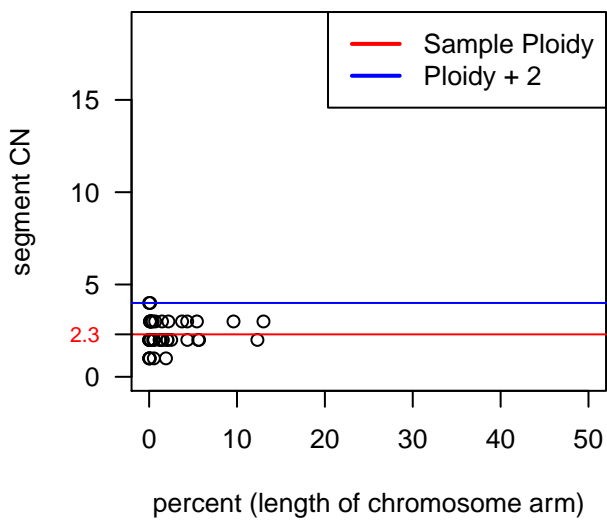

**LTS-013**

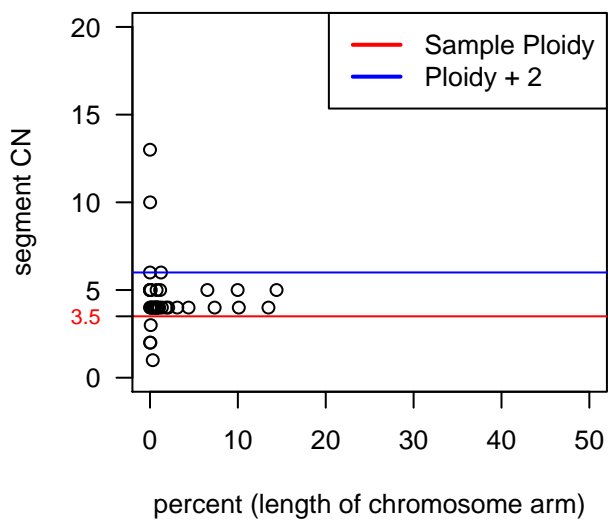

**LTS-014**

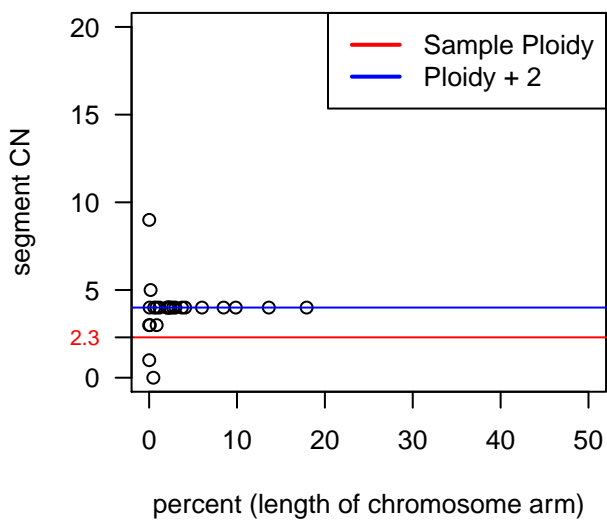



**LTS-021**

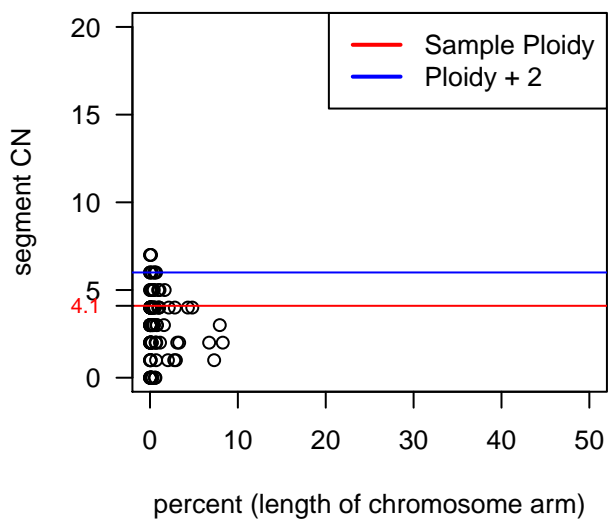

**LTS-022**

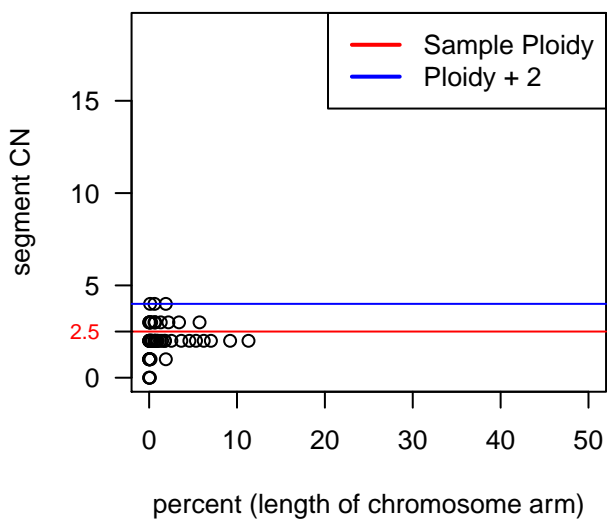

**LTS-023**

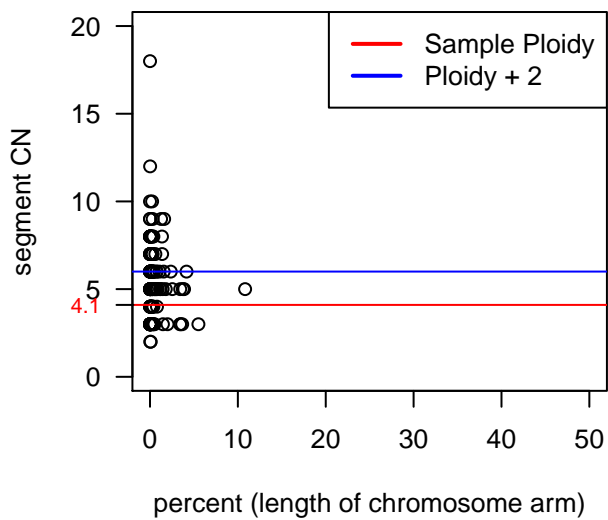

**LTS-024**

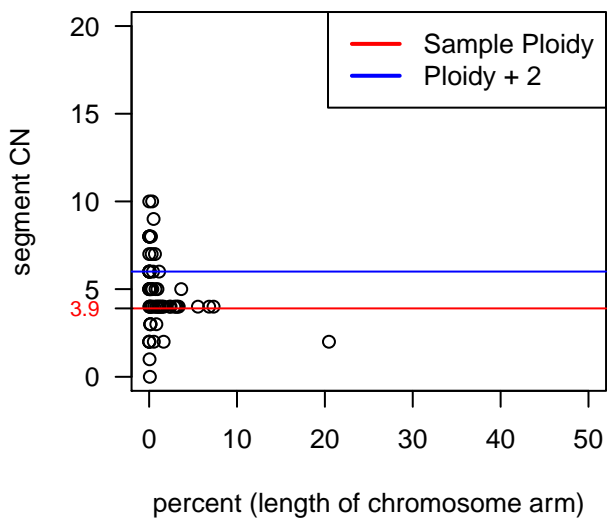

**LTS-025**

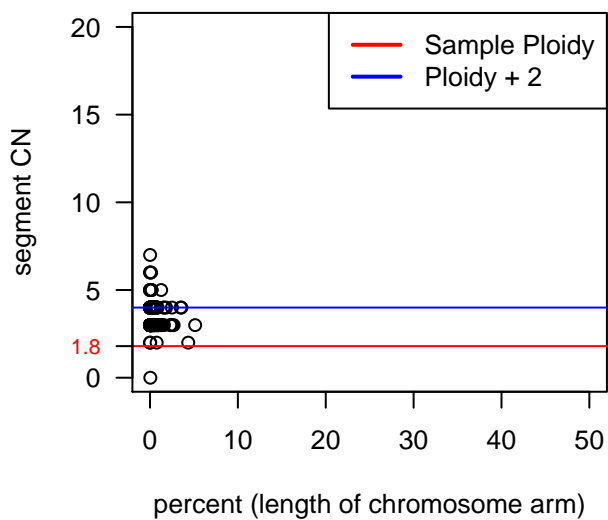

**LTS-026**

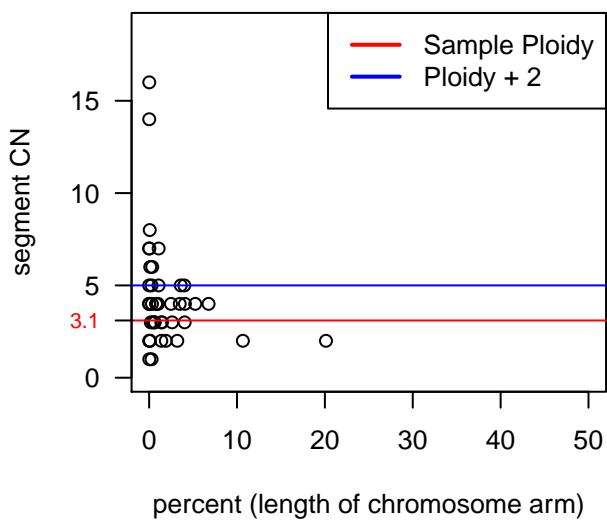

**LTS-027**

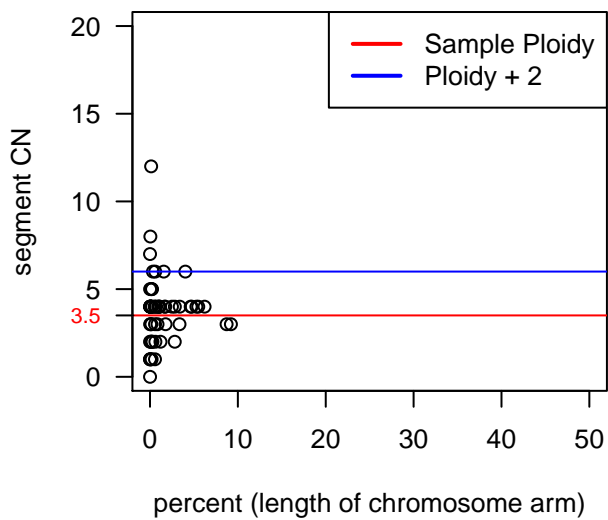

**LTS-028**

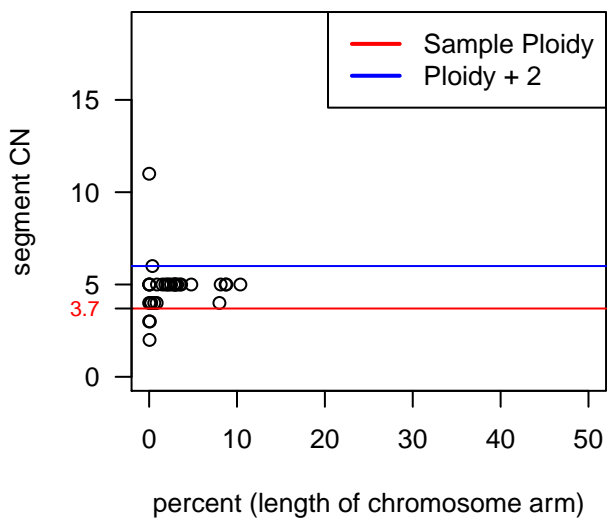

**LTS-029**

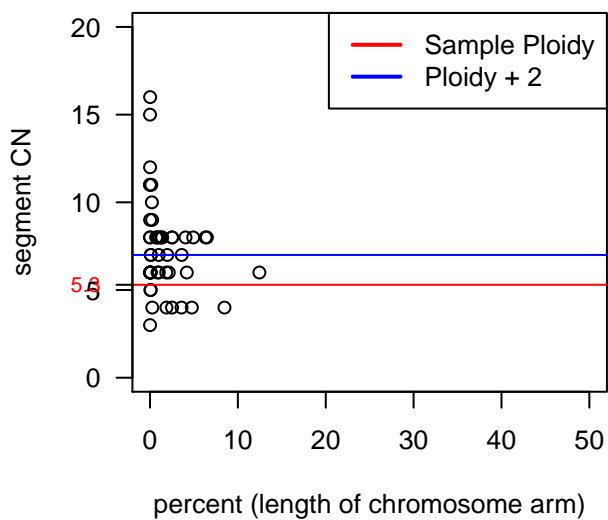

**LTS-030**

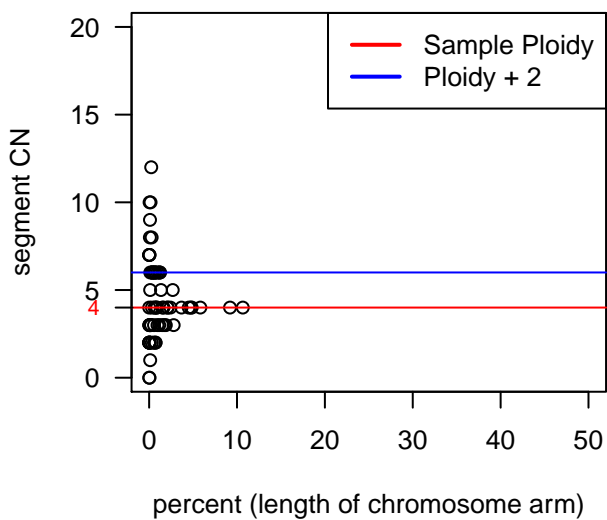

**LTS-031**

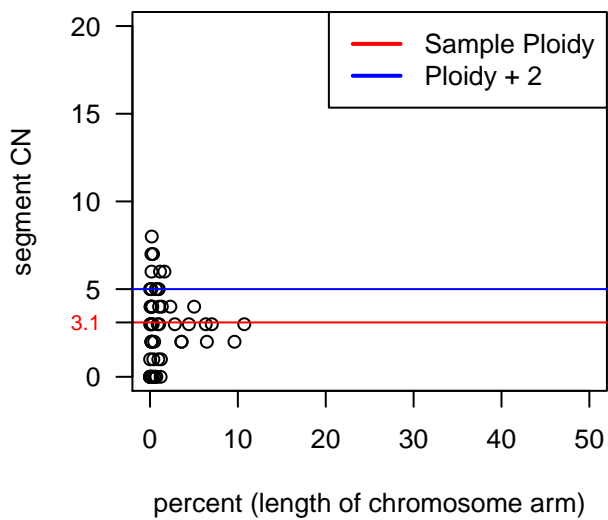

**LTS-032**

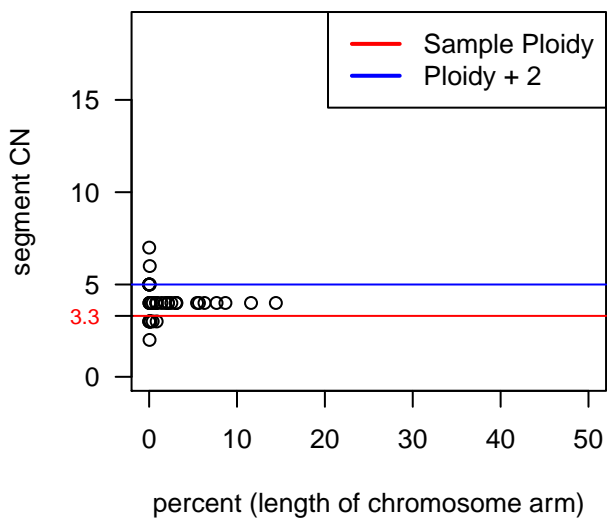



**LTS-033**

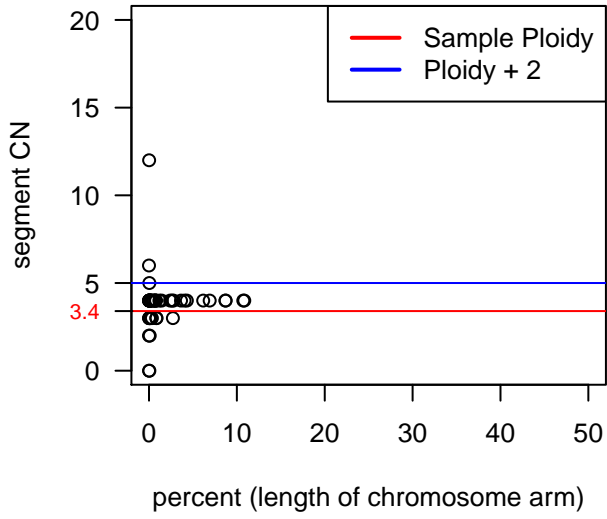

**LTS-034**

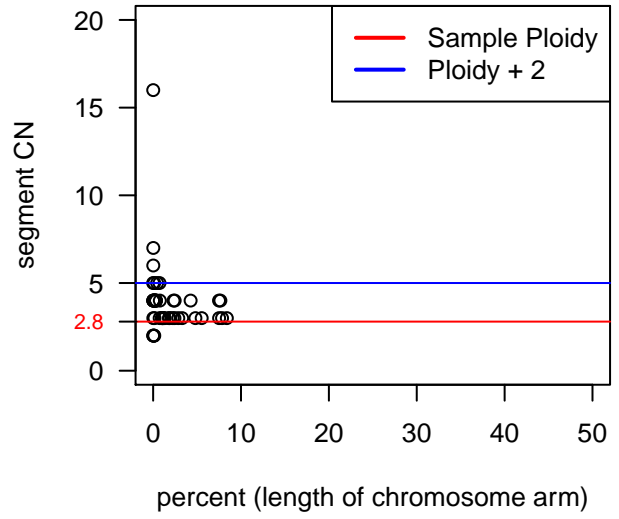

**LTS-035**

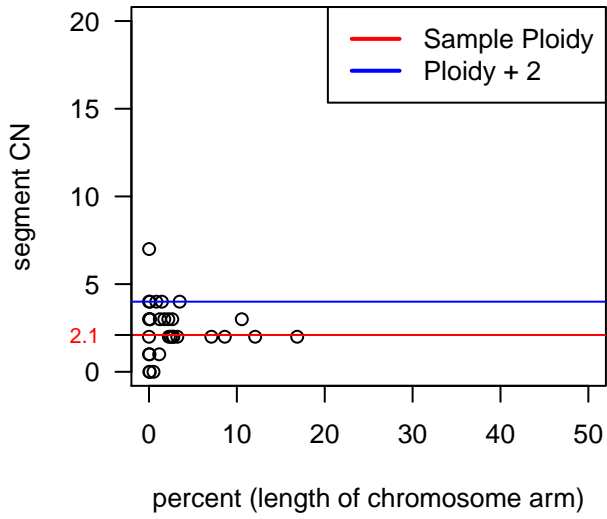

**LTS-036**

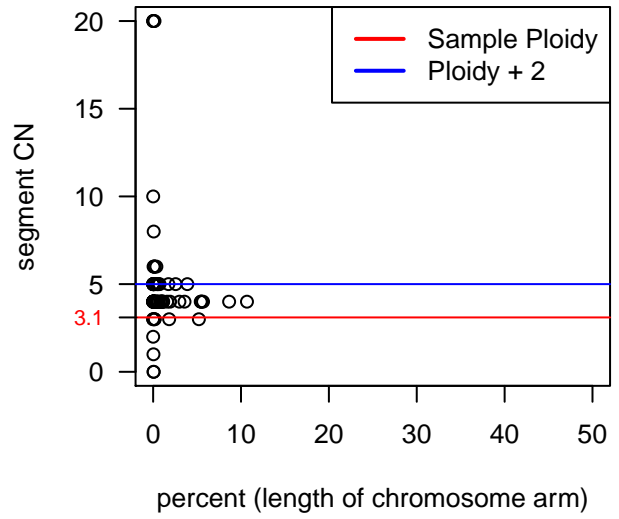

**LTS-037**

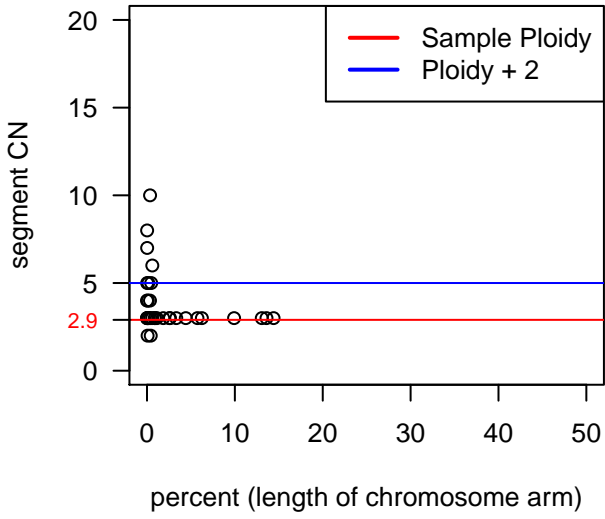

**LTS-038**

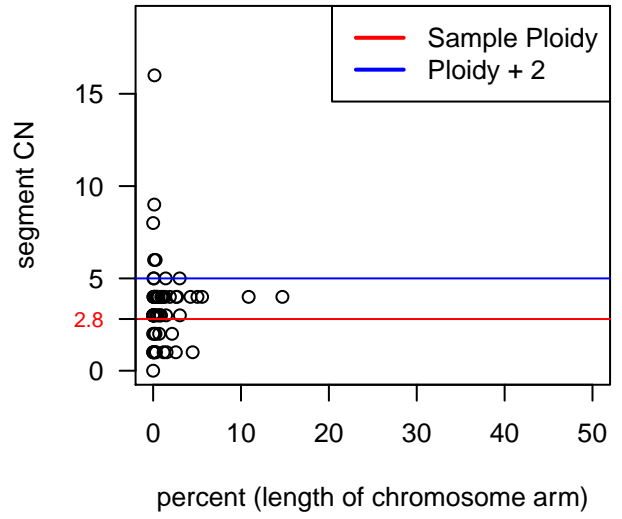

**LTS-039**

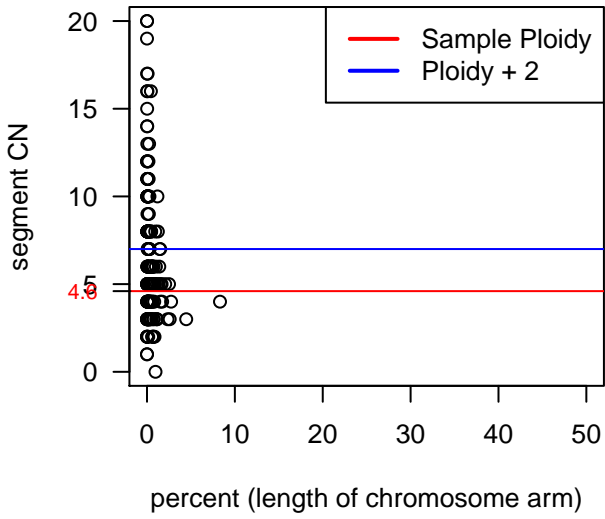

**LTS-040**

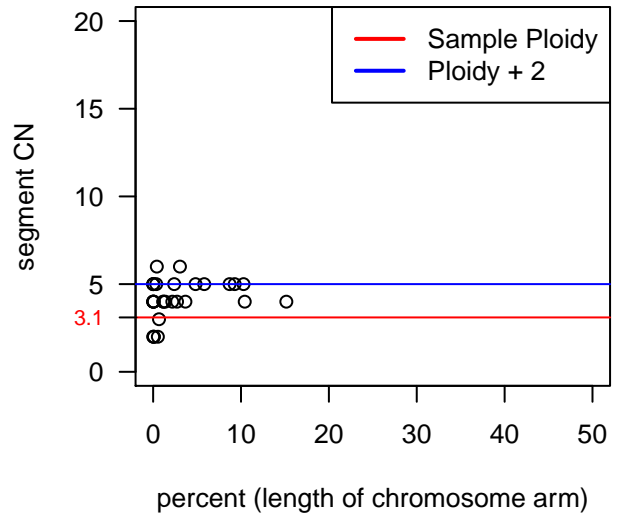

### LTS-041

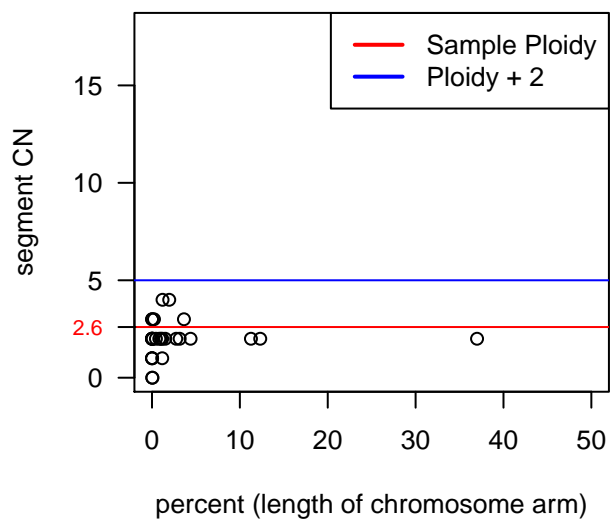

Supplement: 13073_2018_590_MOESM3_ESM.pdf [file 13073_2018_590_MOESM3_ESM.pdf]
